# Supplementary material for: Contrasting dynamic responses of supported Rh nanoparticles to H2S and SO2 and subsequent poisoning of NO reduction by H2Electronic supplementary information (ESI) available: EDE spectra. See http://www.rsc.org/suppdata/cc/b3/b304001a/
Source: Royal Society of Chemistry journal article supplement (doi:10.1039/b304001a), 2003-01-01
Supplement: b304001a.doc [file b304001a.doc]

Supplementary information.

Figure S1 shows representative k3 weighted EDE spectra derived from supported Rh nanoparticle reduced at room temperature before and after exposure to 5% H2S/He and after exposure to 5%SO2/He at 300K. Table S1 gives structural and statistical data derived from analysis in EXCURVE98.

*Figure S1. EDE spectra derived from (a) Rh nanoparticles reduced at 298K*

*(b) After ca. 3 minutes exposure to 5%*

*H2S in He at 298K.*

*(c) After ca. 5 mins exposure to 5% SO2 in He.*

*All spectra acquired with 1.5 secs acquisition time.*

*Experimental data in black, theoretical fits are shown in red.*

Table S1

*R* factor = (∫[T-E]*k*3dk/[E] *k*3dk) x 100% where T and E are the theoretical and experimental EXAFS and *k* is the photoelectron wave vector; the Debye- Waller factor = 22 where 2 is the root mean square internuclear separation.

Figure S2 shows raw EDE absorption spectra derived from supported Rh nanoparticle before and after exposure to 5% SO2/He. Though subtle, a significant attenuation of EXAFS features at ca. 23310eV and 23500 (indicated arrows) occurs during exposure along with small changes in the XANES. Figure S3 shows raw absorption data and temporal changes in the intensity of the former EXAFS feature in more detail.

Figure S2. Raw EDE adsorption data derived from reduced supported Rh nanoparticles (black) and after exposure of those particles to 5% SO2/He (red). EXAFS features observed to undergo significant attenuation during SO2 exposure are indicated by arrows.

The insert shows the temporal variation observed during exposure to 5% SO2/He for the EXAFS feature at 23320 eV.
